# Supplementary material
Source: PubMed Central journal article supplement (PMC3527243)
Supplement: 1b7e51c87dd7f0cdd6f38b60576c766a_genetics.112.142042-4.pdf [file 1b7e51c87dd7f0cdd6f38b60576c766a_genetics.112.142042-4.pdf]

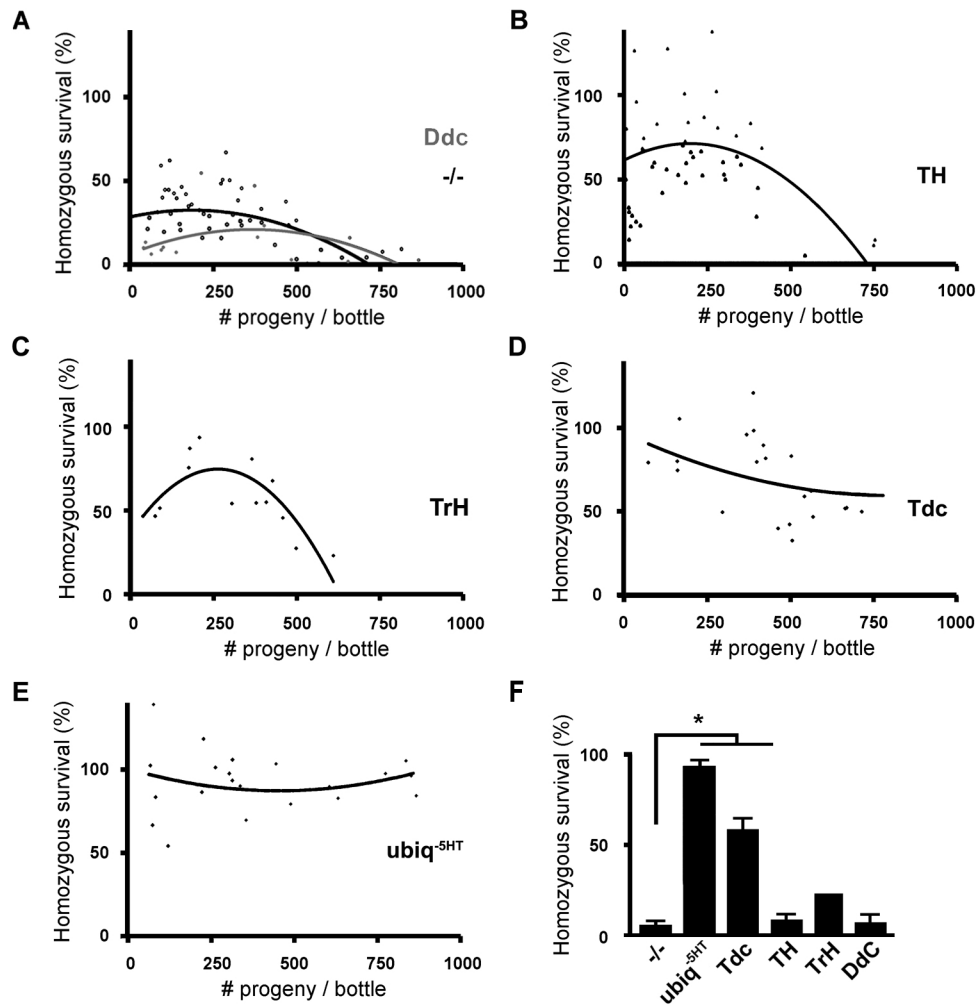

**Figure S3** Homozygous survival plotted as a function of population density, and with *dVMAT* mutants expressing *UAS-DVMAT* using the indicated drivers. (A) Survival of homozygous *dVMAT* progeny ( $^{-/-}$ ) are plotted as a function of population density (black circles). Data for *dVMAT* mutants expressing *UAS-DVMAT* using the *Ddc-Gal4* are shown in gray. Rescue of *dVMAT* using *TH-Gal4* (B), *TrH-Gal4* (C), *Tdc-Gal4* (D), and *daughterless-Gal4* (E) is indicated. Second-order polynomial trendlines are displayed as solid lines. (F) Under standard culture situations (500-1000 progeny/bottle), approximately 6% of the homozygous *dVMAT* null mutant ( $^{-/-}$ ) progeny survive. Expression of a *DVMAT* transgene in DA or 5-HT cells using *TH-Gal4* (TH), *TrH-Gal4* (TrH), or *Ddc-Gal4* (Ddc) respectively, do not rescue the survival deficit, whereas expression of *DVMAT* using *da-Gal4* (*ubiq*<sup>-5HT</sup>) or *Tdc2-Gal4* (Tdc) significantly rescues lethality under standard, high density culture conditions (1-way ANOVA, \*  $p < 0.05$ , Bonferroni post test).
