# Supplementary material
Source: PubMed Central journal article supplement (PMC3527243)
Supplement: 1374b600ae5beb2d5d1a9125e9218716_genetics.112.142042-6.pdf [file 1374b600ae5beb2d5d1a9125e9218716_genetics.112.142042-6.pdf]

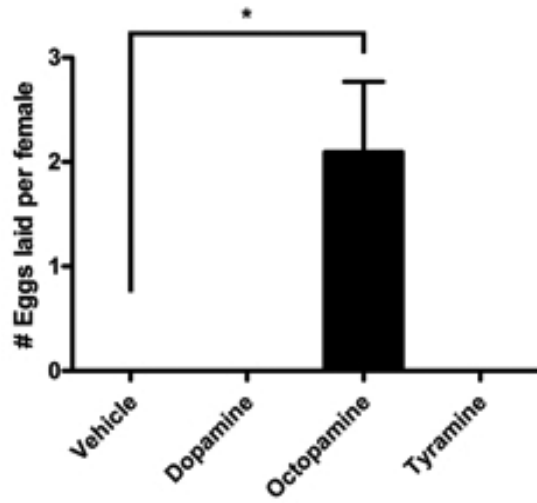

**Figure S6** Octopamine partially rescues egg-laying. Three virgin (0-3 day old) *dVMAT* mutant females were collected and crossed to six virgin WT males (0-3 day old) and allowed to mate for three days on standard fly food. The males were then removed and discarded. The mated females were transferred into colored food containing 10mg/ml vehicle, dopamine, octopamine or tyramine and allowed to lay eggs for 2 days. The average number of eggs laid per female in a 24-hour period was calculated (2-way ANOVA with Bonferroni post-test, \*  $p < 0.05$ ).
