# Supplementary material
Source: PubMed Central journal article supplement (PMC3527243)
Supplement: 601450bc3ca1643c3827aac7f912ba24_genetics.112.142042-7.pdf [file 601450bc3ca1643c3827aac7f912ba24_genetics.112.142042-7.pdf]

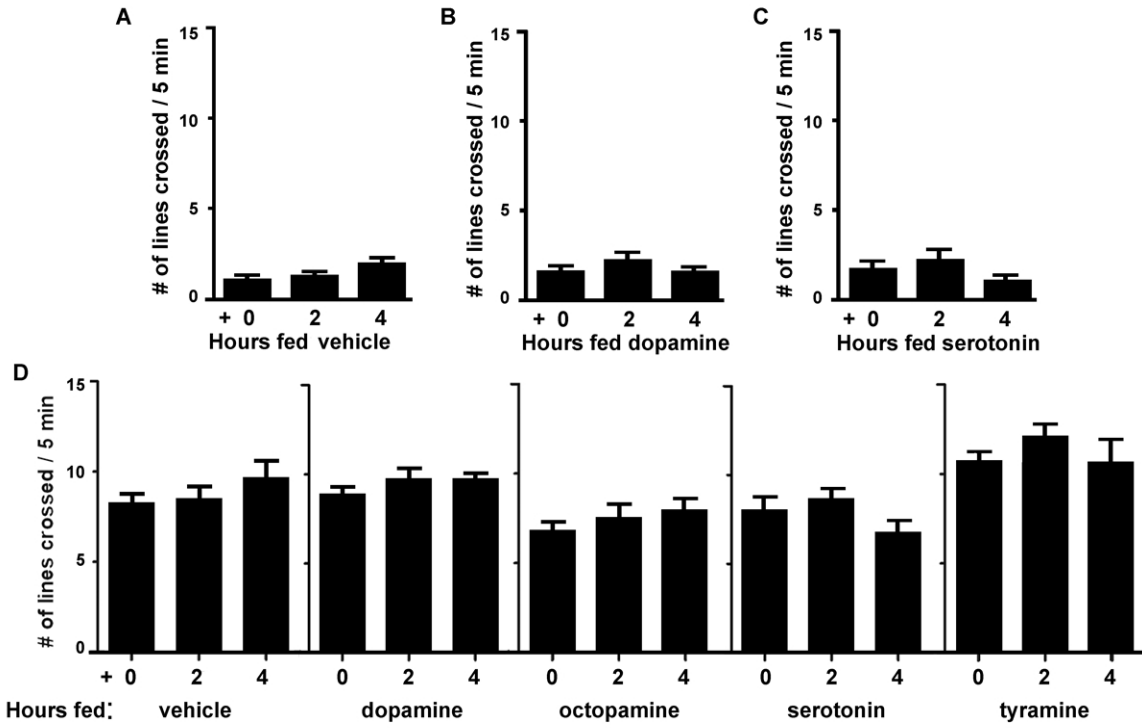

**Figure S5** Controls for locomotion assays. (A-C) Feeding vehicle, dopamine (10 mg/mL) or serotonin (10mg/mL) does not alter *dVMAT* locomotion. (D) Locomotion was scored for WT larvae incubated on food containing the indicated amines (10 mg/ml) for 0, 2 and 4 hours. Locomotion of WT larvae is not detectably altered under these conditions.
