# Supplementary material
Source: PubMed Central journal article supplement (PMC3527243)
Supplement: cf73e2711b88eedd74311786c7905e65_genetics.112.142042-2.pdf [file cf73e2711b88eedd74311786c7905e65_genetics.112.142042-2.pdf]

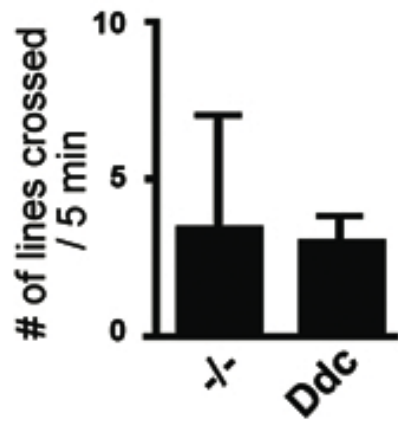

**Figure S4** Expression of *UAS-DVMAT* using *Ddc-Gal4* does not rescue larval locomotion deficits of the *dVMAT* mutant. Expression of *DVMAT* using *Ddc2-Gal4* does not rescue the larval locomotion deficit of the *dVMAT* mutant (-/-). These data were obtained in a separate set of experiments from those shown in FIGURE 2A.
