# Supplementary material
Source: PubMed Central journal article supplement (PMC3527243)
Supplement: e22d7ccac64ff3e1a14b357f9b0b82c7_genetics.112.142042-8.pdf [file e22d7ccac64ff3e1a14b357f9b0b82c7_genetics.112.142042-8.pdf]

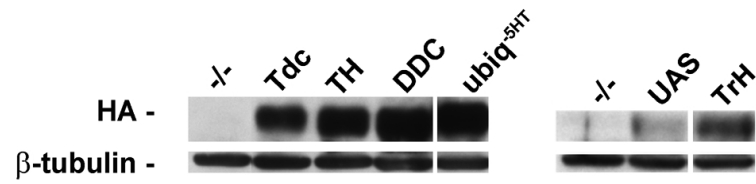

**Figure S1** Protein expression and neurotransmitter content in genetically rescued *dVMAT* mutants. (A) Western blots show expression of the HA-tagged DVMAT transgene in *dVMAT* mutant (-/-) expressing *UAS-DVMAT* with the indicated drivers, *TH-Gal4* (TH), *Tdc2-Gal4* (Tdc), *TrH-Gal4* (TrH), *Ddc-Gal4* (DDC), and *da-Gal4* (*ubiq*<sup>5HT</sup>). Note that the *UAS-DVMAT* transgene (UAS) shows “leaky” expression in the absence of driver.
